# Supplementary material for: Investigation of supramolecular structures in various aqueous solutions of an amyloid forming peptide using small-angle X-ray scattering
Source: Royal Society of Chemistry journal article supplement (doi:10.1039/d3sm01172k), 2024-01-01
Supplement: d3sm01172k1.pdf [file d3sm01172k1.pdf]

## Supplementary material

### SAXS Data Analysis

SAXS data were analysed with a model with form factor for a spheroidal oligomer with semi-axes,  $a$  and  $b$  (cf. Fig S1).

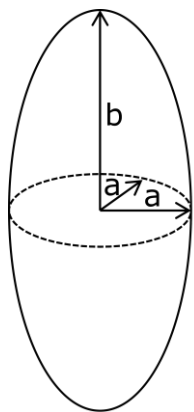

Figure S1: Depiction of spheroid with semi-axes  $a$  and  $b$ , in which  $b > a$ .

The differential scattering cross section as a function of scattering vector  $q$  for a sample of interacting oligomers with concentration  $n$  (number of particles per unit volume) can be written as follows<sup>1</sup>

$$\frac{d\sigma(q)}{d\Omega} = n(\Delta\rho V)^2 P(q)[1 + \beta(q)(S(q) - 1)] \quad (S1)$$

where the structure factor  $S(q)$  has been taken into account using the decoupling approximation.<sup>2</sup>

The orientationally averaged form factor for a spheroid may be written as

$$P(q) = \langle F^2(q) \rangle = \int_0^{\pi/2} F(q, \phi)^2 \sin \phi \, d\phi \quad (S2)$$

and

$$\beta(q) = \frac{\langle F(q) \rangle^2}{\langle F^2(q) \rangle} \quad (S3)$$

The amplitude of the form factor is defined as

$$F(qr) = \frac{3(\sin qr - qr \cos qr)}{(qr)^3} \quad (S4)$$

where

$$r = \sqrt{a^2 \sin^2 \phi + b^2 \cos^2 \phi} \quad (S5)$$

and

$$\langle F(q) \rangle = \int_0^{\pi/2} F(q, \phi) \sin \phi \, d\phi \quad (S6)$$

The structure factor was based on the scattering by mass fractal objects, as described by Teixeira.<sup>3</sup> Fractal objects have two characteristics: self-similarity and the fractal dimension. Self-similarity means that a structural element is repeated throughout the object, and the fractal dimension can be described as the roughness or complexity of the object. The scattering, as a function of  $q$ , from fractal objects is based on equation 7

$$S(q) = 1 + \frac{D}{R^D} \int_0^\infty \frac{r^{D-1} \exp\left(-\frac{r}{\xi}\right) \sin(qr)}{Qr} dr = \\ + \frac{1}{(qR)^D} \frac{D\Gamma(D-1)}{\left[1 + \frac{1}{q^2\xi^2}\right]^{\frac{D-1}{2}}} \sin[(D-1) \tan^{-1}(q\xi)] \quad (S7)$$

in which  $D$  is the mass fractal dimension,  $R$  is the size of the scatterer, and  $\xi$  is the size of the clusters. In this case, the scattering particles formed large clusters, and the parameter  $\xi$  was set to approach infinity. With this assumption, equation S7 is simplified to

$$S(Q) = 1 + \frac{D\Gamma(D-1)}{(QR)^D} \sin\left[\frac{\pi}{2}(D-1)\right] \quad (S8)$$

and the resulting equation describes the scattering as a function of  $q$  depending on two variables,  $D$  and  $R$ .

The parameters in the model were optimized by means of conventional least squares analysis. (Pedersen 1997; B. R. Bevington, *Data reduction and error analysis for physical sciences*, McGraw-Hill, New York, 1969) The quality of the fits were measured in terms of the reduced chi-squared parameter defined as

$$\chi^2 = \frac{1}{N-M} \sum_{i=1}^N \left( \frac{I_{exp}(q_i) - I_{mod}(q_i)}{\sigma_i} \right)^2 \quad (S9)$$

where  $I_{exp}(q_i)$  and  $I_{mod}(q_i)$  are the experimental and model intensities, respectively, at a scattering vector modulus  $q_i$ ,  $\sigma_i$  is the statistical uncertainties on the data points,  $N$  is the total number of data points and  $M$  is the number of parameters optimized in the model fit. All our scattering data could be fitted with one single model using the four fitting parameters ( $a$ ,  $b$ ,  $R$  and  $D$ ). In addition, the quantity  $n(\Delta\rho V)^2$  was used as a scaling parameter and the residual background scattering as an additive parameter. The minor semi-axis  $a$  could, however, not be accurately determined for most of our samples due to lack of scattering data in the high  $q$ -regime.

Scattering data for 2.5-7.5 mg cm<sup>-3</sup> pramlintide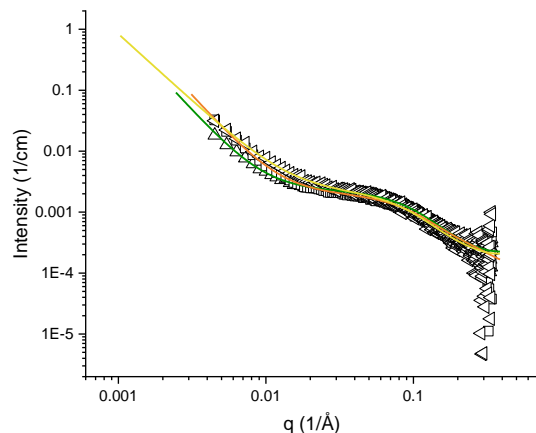

Figure S2: SAXS curves for 2.5-7.5 mg cm<sup>-3</sup> pramlintide in water 7.5 mg cm<sup>-3</sup> ( $\Delta$ ), 5 mg cm<sup>-3</sup> ( $\square$ ), 2.5 mg cm<sup>-3</sup> ( $\diamond$ ) and fitted result as solid line.

Table S1: Dimensions of scattering particles in 2.5-7.5 mg cm<sup>-3</sup> pramlintide in water obtained from model fitting.

| Concentration (mg cm <sup>-3</sup> ) | Semi-axis <i>b</i> (nm) | Volume (nm <sup>3</sup> ) | Molecules/particle | R (nm)  | D       |
|--------------------------------------|-------------------------|---------------------------|--------------------|---------|---------|
| 7.5                                  | 3.5±0.2                 | 14.8                      | 2.3                | 8.3±0.4 | 2.7±0.1 |
| 5                                    | 3.5±0.2                 | 14.6                      | 2.2                | 6.3±0.3 | 2.6±0.1 |
| 2.5                                  | 3.9±0.4                 | 16.2                      | 2.5                | 6.4±0.4 | 2.2±0.1 |

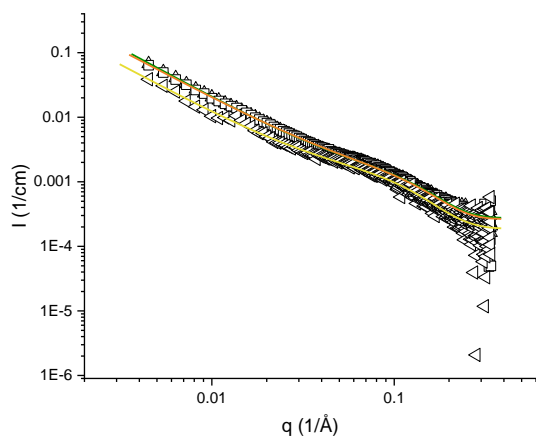

Figure S3: SAXS curves for 2.5-7.5 mg cm<sup>-3</sup> pramlintide in 1 mM NaSCN 7.5 mg cm<sup>-3</sup> ( $\Delta$ ), 5 mg cm<sup>-3</sup> ( $\square$ ), 2.5 mg cm<sup>-3</sup> ( $\diamond$ ) and fitted result as solid line.

Table S2: Dimensions of scattering particles in 2.5-7.5 mg cm<sup>-3</sup> pramlintide in 1 mM NaSCN obtained from model fitting.

| Concentration (mg cm <sup>-3</sup> ) | Semi-axis <i>b</i> (nm) | Volume (nm <sup>3</sup> ) | Molecules/particle | R (nm)  | D       |
|--------------------------------------|-------------------------|---------------------------|--------------------|---------|---------|
| 7.5                                  | 2.4±0.2                 | 10.0                      | 1.5                | 1.5±0.1 | 1.5±0.1 |
| 5                                    | 2.4±0.2                 | 10.0                      | 1.5                | 1.4±0.1 | 1.5±0.1 |
| 2.5                                  | 2.8±0.5                 | 11.7                      | 1.8                | 2.2±0.2 | 1.5±0.1 |

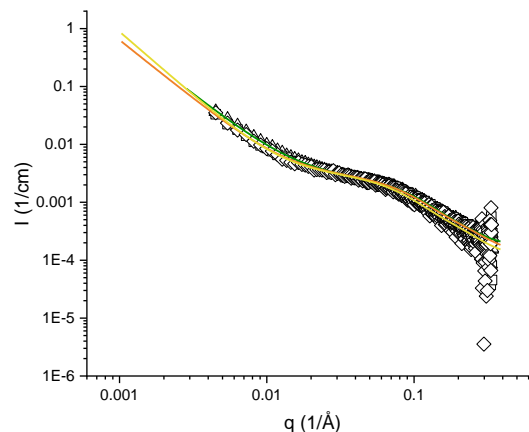

Figure S4: SAXS curves for 2.5-7.5 mg cm<sup>-3</sup> pramlintide in 1 mM NaCl 7.5 mg cm<sup>-3</sup> ( $\Delta$ ), 5 mg cm<sup>-3</sup> ( $\square$ ), 2.5 mg cm<sup>-3</sup> ( $\diamond$ ) and fitted result as solid line.

Table S3: Dimensions of scattering particles in 2.5-7.5 mg cm<sup>-3</sup> pramlintide in 1 mM NaCl obtained from model fitting.

| Concentration (mg cm <sup>-3</sup> ) | Semi-axis <i>b</i> (nm) | Volume (nm <sup>3</sup> ) | Molecules/particle | R (nm)  | D       |
|--------------------------------------|-------------------------|---------------------------|--------------------|---------|---------|
| 7.5                                  | 3.5±0.1                 | 14.7                      | 2.2                | 5.6±0.2 | 2.0±0.1 |
| 5                                    | 3.9±0.2                 | 16.2                      | 2.5                | 6.7±0.3 | 2.0±0.1 |
| 2.5                                  | 4.3±0.3                 | 18.2                      | 2.8                | 7.2±0.5 | 2.2±0.1 |

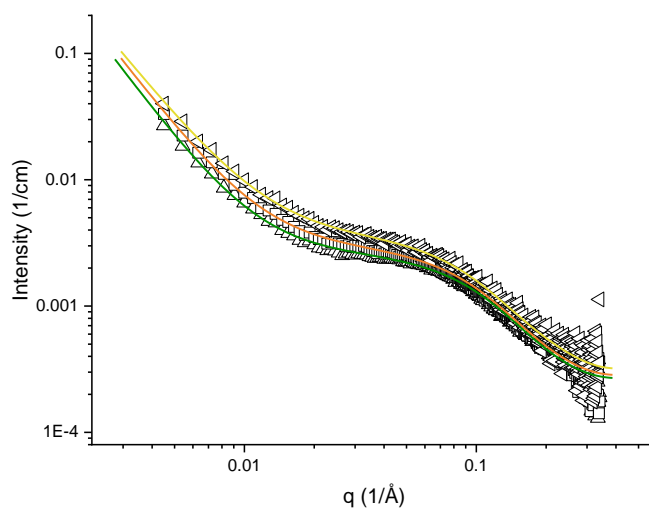

Figure S5: SAXS curves for 2.5-7.5 mg cm<sup>-3</sup> pramlintide in 1 mM NaF, 7.5 mg cm<sup>-3</sup> ( $\Delta$ ), 5 mg cm<sup>-3</sup> ( $\square$ ), 2.5 mg cm<sup>-3</sup> ( $\diamond$ ) and fitted result as solid line.

Table S4: Dimensions of scattering particles in 7.5-2.5 mg cm<sup>-3</sup> pramlintide in 1 mM NaF obtained from model fitting.

| Concentration (mg cm <sup>-3</sup> ) | Semi-axis <i>b</i> (nm) | Volume (nm <sup>3</sup> ) | Molecules/particle | R (nm)  | D       |
|--------------------------------------|-------------------------|---------------------------|--------------------|---------|---------|
| 7.5                                  | 3.4±0.2                 | 14.2                      | 2.2                | 7.7±0.4 | 2.5±0.1 |
| 5                                    | 3.6±0.2                 | 15.0                      | 2.3                | 7.4±0.3 | 2.4±0.1 |
| 2.5                                  | 3.8±0.3                 | 15.9                      | 2.4                | 7.3±0.4 | 2.3±0.1 |

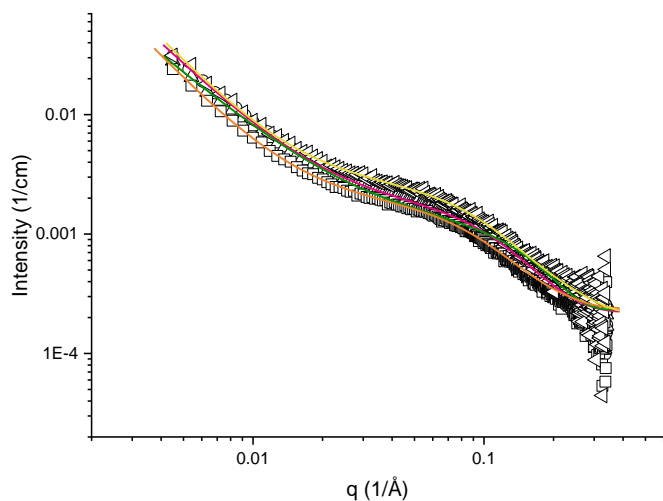

Figure S6: SAXS curves for 2.5-7.5 mg cm<sup>-3</sup> pramlintide in 1 wt% DMSO 7.5 mg cm<sup>-3</sup> ( $\Delta$ ), 5 mg cm<sup>-3</sup> ( $\square$ ), 2.5 mg cm<sup>-3</sup> ( $\nabla$ ) and fitted result as solid line.

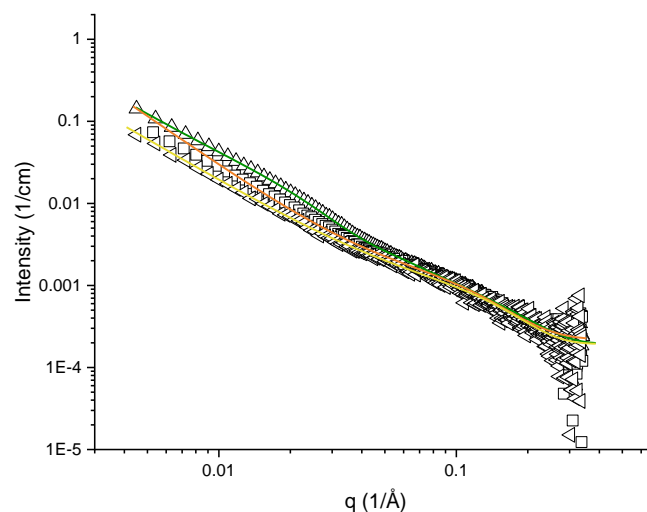

Figure S9: SAXS curves for 2.5-7.5 mg cm<sup>-3</sup> pramlintide in 20 wt% DMSO 7.5 mg cm<sup>-3</sup> ( $\Delta$ ), 5 mg cm<sup>-3</sup> ( $\square$ ), 2.5 mg cm<sup>-3</sup> ( $\nabla$ ) and fitted result as solid line.

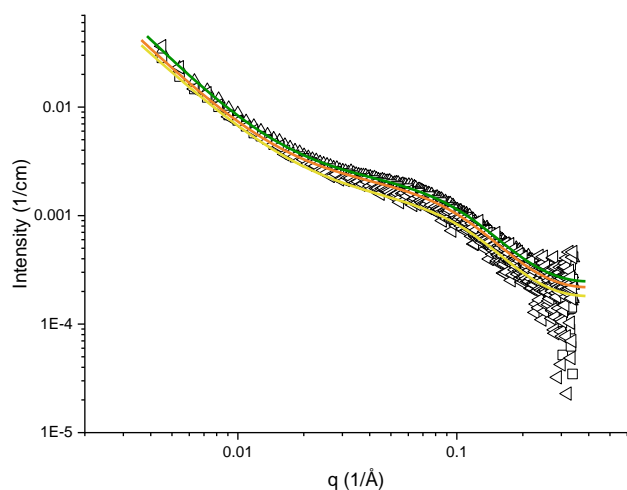

Figure S7: SAXS curves for 2.5-7.5 mg cm<sup>-3</sup> pramlintide in 5 wt% DMSO 7.5 mg cm<sup>-3</sup> ( $\Delta$ ), 5 mg cm<sup>-3</sup> ( $\square$ ), 2.5 mg cm<sup>-3</sup> ( $\nabla$ ) and fitted result as solid line.

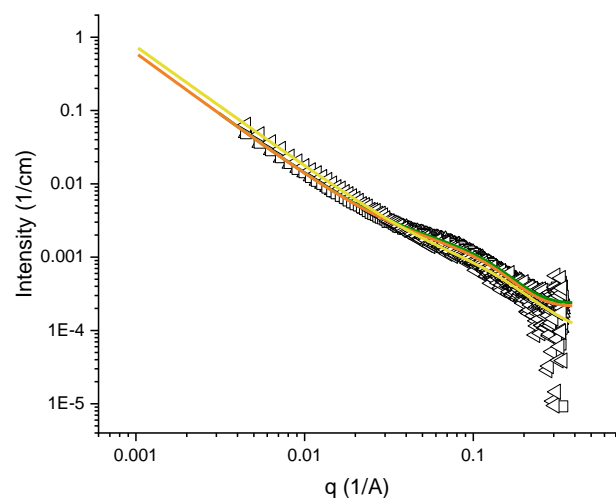

Figure S8: SAXS curves for 2.5-7.5 mg cm<sup>-3</sup> pramlintide in 10 wt% DMSO 7.5 mg cm<sup>-3</sup> ( $\Delta$ ), 5 mg cm<sup>-3</sup> ( $\square$ ), 2.5 mg cm<sup>-3</sup> ( $\nabla$ ) and fitted result as solid line.

Table S5: Dimensions of scattering particles in 7.5-2.5 mg cm<sup>-3</sup> pramlintide in 1-20 wt% DMSO obtained from model fitting.

| Solvent  | Concentration (mg cm <sup>-3</sup> ) | Semi-axis <i>b</i> (nm) | Volume (nm <sup>3</sup> ) | Molecules/ particle | R (nm)  | D       |
|----------|--------------------------------------|-------------------------|---------------------------|---------------------|---------|---------|
| 1% DMSO  | 7.5                                  | 2.0±0.3                 | 8.2                       | 1.3                 | 3.1±0.2 | 1.6±0.1 |
|          | 5                                    | 3.1±0.1                 | 13.0                      | 2.0                 | 4.7±0.2 | 1.9±0.1 |
|          | 2.5                                  | 3.6±0.2                 | 14.9                      | 2.3                 | 6.0±0.3 | 2.1±0.1 |
| 5% DMSO  | 7.5                                  | 3.3±0.2                 | 13.8                      | 2.1                 | 5.6±0.2 | 2.0±0.1 |
|          | 5                                    | 3.8±0.4                 | 14.1                      | 2.1                 | 6.0±0.5 | 2.0±0.1 |
|          | 2.5                                  | 3.1±0.1                 | 13.0                      | 2.0                 | 4.7±0.2 | 1.9±0.1 |
| 10% DMSO | 7.5                                  | 2.7±0.2                 | 11.3                      | 1.7                 | 2.6±0.1 | 1.7±0.1 |
|          | 5                                    | 2.7±0.2                 | 11.2                      | 1.7                 | 2.4±0.1 | 1.7±0.1 |
|          | 2.5                                  | 2.3±0.4                 | 9.53                      | 1.5                 | 1.6±0.1 | 1.7±0.1 |
| 20% DMSO | 7.5                                  | 16.4±0.2                | 68.7                      | 11                  | 6.2±0.1 | 1.7±0.1 |
|          | 5                                    | 2.8±0.2                 | 11.8                      | 1.8                 | 2.1±0.2 | 2.0±0.1 |
|          | 2.5                                  | 2.3±0.4                 | 9.67                      | 1.5                 | 1.6±0.1 | 1.7±0.1 |

#### Dynamic light scattering (DLS)

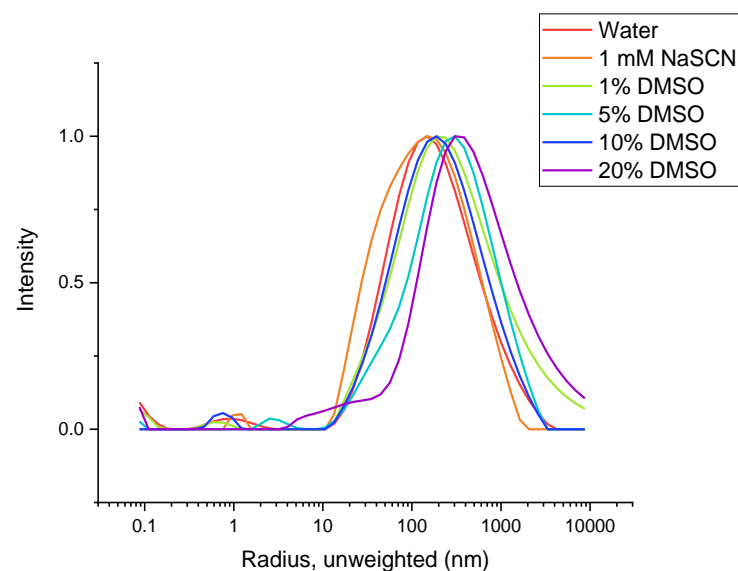

Figure S10: Distribution of hydrodynamic radii of 10 mg/ml pramlintide in water, 1 mM NaSCN, and 1-20% DMSO

**Cryogenic transmission electron microscopy (cryo-TEM)**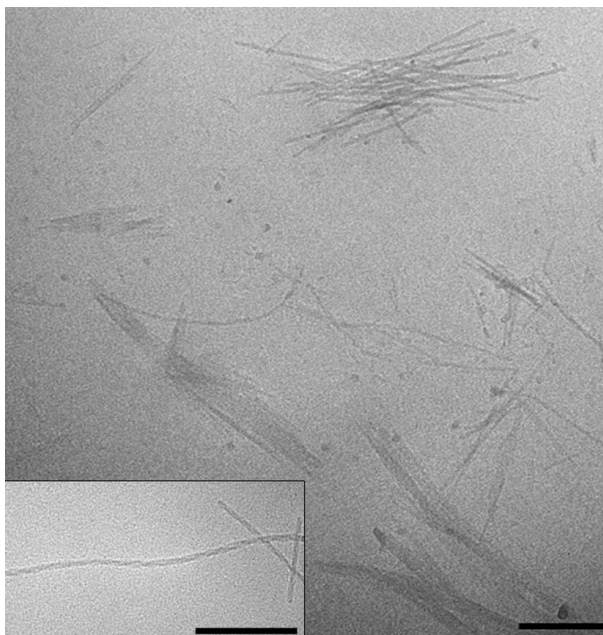

Figure S11: Cryo-TEM images of 10 mg/ml pramlintide in water. The inset shows detail of fibrils suggesting a twisted structure. The scale bar represents 200 nm.

**References**

- 1 J. S. Pedersen, *Adv. Colloid Interface Sci.*, 1997, **70**, 171–210.
- 2 M. Kotlarchyk and S. Chen, *J. Chem. Phys.*, 1983, **79**, 2461–2469.
- 3 J. Teixeira, *J. Appl. Crystallogr.*, 1988, **21**, 781–785.
